# Supplementary material
Source: PubMed Central journal article supplement (PMC6202237)
Supplement: NIHMS985646-supplement-Fig_E1.pdf [file NIHMS985646-supplement-Fig_E1.pdf]

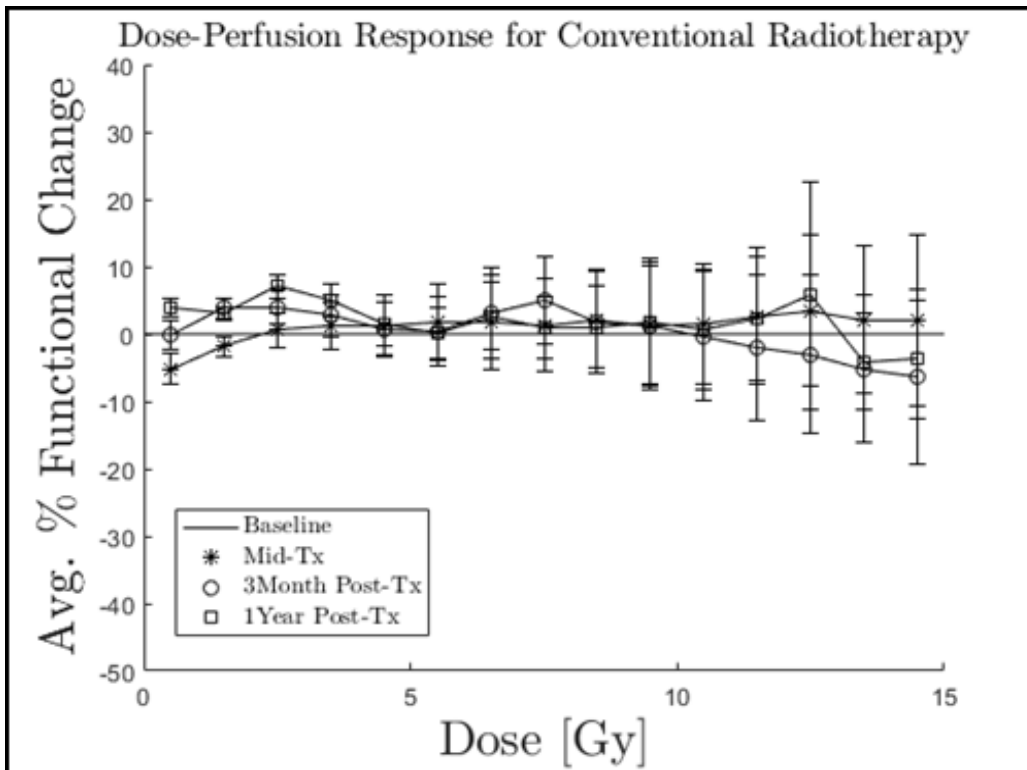

**Supplemental Figure 1:** Population-average data points describing the longitudinal change observed in the contralateral lung for all conventionally-fractionated RT patients. The number of patients contributing at each timepoint is shown in Table I and average functional change was measured over 1 Gy dose bins. Error bars represent the standard error based on the number of voxels contributing to the data point.
